# Supplementary material
Source: Research Square preprint supplement (doi:10.21203/rs.3.rs-9906972/v1)
Supplement: Supplementary file 1 [file 449f27184da8518ea68056d6.docx]

**Supplementary** **Material for**

**Piezoelectric manipulation and stacking-dependent magnetism in ferrovalley materials**

Jia Li[[1]](#footnote-0)*,1, Shiyao Zhang1, Tong Wei1, Xiong Yang1 & Limin Liu*,2

**Ⅰ. Spin Hamiltonian model**

Four different magnetic configurations (, , and ) were established to obtain the Heisenberg exchange parameters (, and ). Here, the interlayer AFM coupling and intralayer FM coupling of all stacking patterns are understood by deducing the Hamiltonian for four spin configurations.

For AA-0 stacking,

|  | (1) |
| --- | --- |

For AA-1 stacking,

|  | (2) |
| --- | --- |

For AA-2 stacking,

|  | (3) |
| --- | --- |

For AB-0 stacking,

|  | (4) |
| --- | --- |

For AB-1 stacking,

|  | (5) |
| --- | --- |

For AB-2 stacking,

|  | (6) |
| --- | --- |

where, FM1, FM2, AFM1 and AFM2 represent the intralayer magnetic configuration. The spin quantum number S = 0.5, and the results are summarized in Table. S2.

**Ⅱ. Tables S1 and S2**

**Table S1.** The lattice constants , MAE (), the energy difference between AFM1, AFM2, AFM3 and FM ording and the Heisenberg exchange parameters and (meV) of monolayer 2*H*-LaHF and 1*T*-LaHF.

| Material |  | MAE | MAE1 | MAE2 | MAE3 |  |  |
| --- | --- | --- | --- | --- | --- | --- | --- |
| 2*H*-LaHF | 3.71 | 787 | 6.65 | 15.30 | 16.30 | -17.21 | 1.78 |
| 1*T*-LaHF | 3.82 | 33 | 17.98 | 39.63 | 40.70 | -43.20 | 3.60 |

**Table S2.** Interlayer distance of nearest neighbors and next-nearest neighbors between La atoms, the number of magnetic exchange interactions per unit cell in brackets, the Heisenberg exchange parameters and the energy difference between interlayer AFM and FM states for the different stacking configurations

| Stacking | La-La NN (Å) | La-La next-NN (Å) | (meV) |  |  |  |
| --- | --- | --- | --- | --- | --- | --- |
| AA-0 | 5.47 [1] | 6.60 [6] | -7.708 | 0.164 | 0.039 | 0.200 |
| AA-1 | 4.76 [3] | 6.04 [3] | -3.647 | -0.052 | 0.804 | 1.129 |
| AA-2 | 4.36 [3] | 5.76 [3] | -10.696 | 2.658 | 1.091 | 5.622 |
| AB-0 | 4.34 [3] | 5.70 [3] | -7.719 | -0.481 | 6.020 | 8.308 |
| AB-1 | 4.79 [1] | 6.05 [6] | -6.749 | -0.475 | 0.115 | 0.122 |
| AB-2 | 5.74 [3] | 7.76 [3] | -7.733 | -0.023 | 0.099 | 0.115 |

**Ⅲ. Figures S1 to S12**


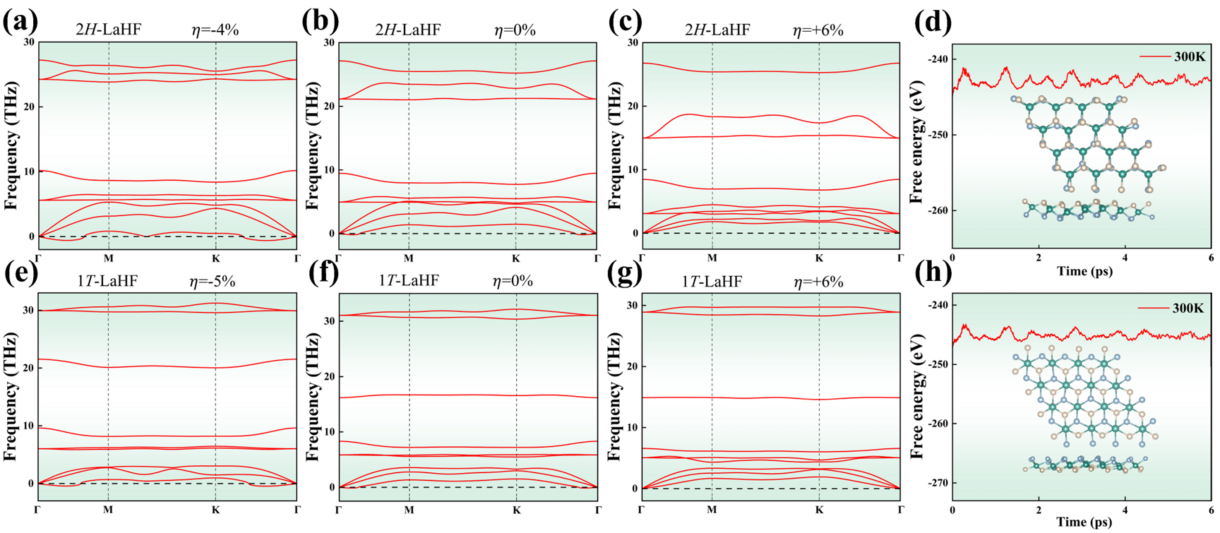


**Fig. S1.** (a)-(c) The phonon dispersion spectrum of 2*H*-LaHF under different biaxial strains. (d) The fluctuation of total energy and snapshots of geometric structures for 2*H*-LaHF. (e)-(g) The phonon dispersion spectrum of 1*T*-LaHF under different biaxial strains. (h) The fluctuation of total energy and snapshots of geometric structures for 1*T*-LaHF.

The Polar coordinates can be used to describe the Young's modulus *Y* and Poisson's ratio *ν* of 2D materials:

|  | (7) |
| --- | --- |
|  | (8) |

Here, represents the angle relative to the x-axis. The *Y* of LaHF exhibits the isotropic characteristics in plane. Compared with the *Y* of typical 2D materials such as graphene (350 N/m) and H-BN (270 N/m), LaHF exhibits lower stiffness and greater flexibility under different strain. Meanwhile, the Poisson's ratio of LaHF is higher than that of graphene (0.175) and H-BN (0.211).


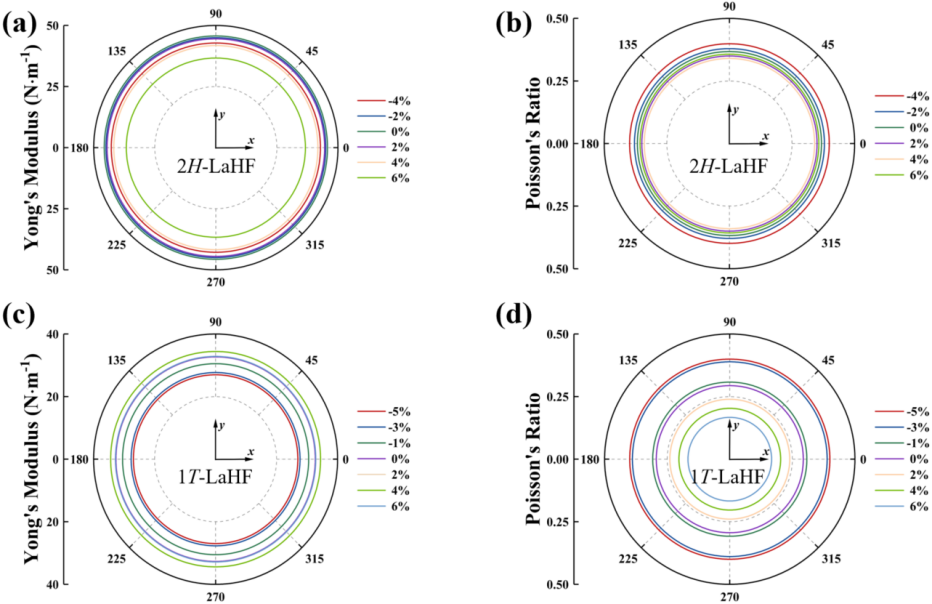


**Fig. S2.** The (a) Young’s modulus and (b) Poisson’s ratio for 2*H*-LaHF monolayer. The (c) Young’s modulus and (d) Poisson’s ratio for 1*T*-LaHF monolayer.


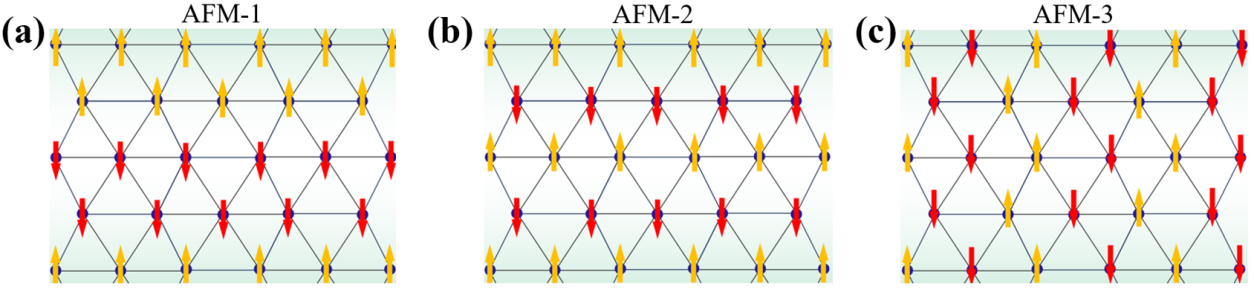


**Fig. S3.** The (a) AFM-1, (b) AFM-2 and (c) AFM-3 configurations for 2*H*-LaHF and 1*T*-LaHF.

The valley and spin polarizations can flip with the flipping of the magnetization direction, indicating the coupling between valley, spin degree of freedom and FM (in Figs. S4(a) and (b). The mechanism of the valley polarization generation is attributed to the different orbital contributions. As shown in Figs. S4(f) and (g), the basic functions of VBM and CBM can be chosen as: , , where indicates the valley index at K and K' valleys. The Hamiltonian of SOC can be written as:

|  | (9) |
| --- | --- |

where L and S represent the orbital angular momentum and the spin angular momentum, respectively. is the magnetocrystalline angle, and . Therefore, the energy levels at VBM and CBM can be expressed as: and . It can be concluded that the energy difference at VBM and CBM can be expressed as: and . Based on the above formula, SOC effect leads to valley polarization at VBM and CBM, which is consistent with DFT calculation results.


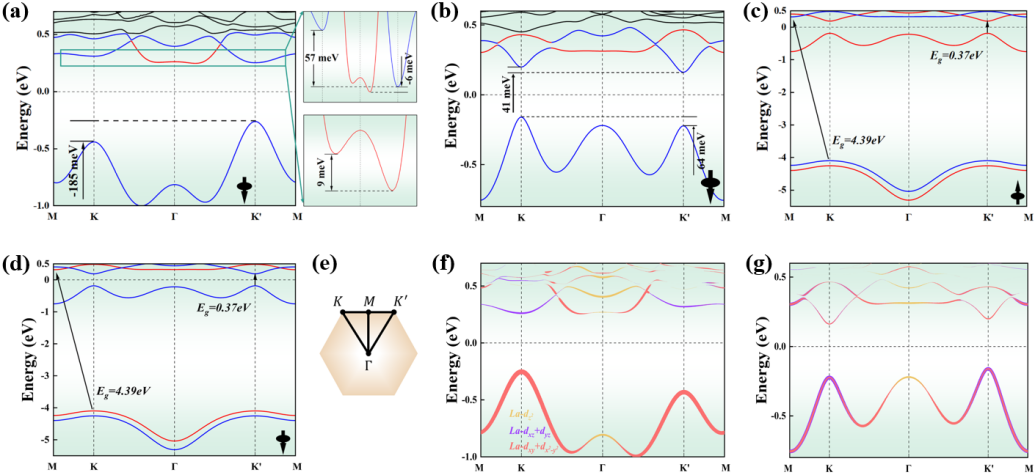


**Fig. S4.** The electronic band structures of (a) 2*H*-LaHF and (b) 1*T*-LaHF. The spin bandgaps of 1*T*-LaHF at (c) + and (d) - magnetic moment direction of La. (e) The schematic diagram of the first Brillouin zone. The projected electronic band structures of (f) 2*H*-LaHF and (g) 1*T*-LaHF. The black arrow indicates the magnetic moment direction of La along the z-axis.


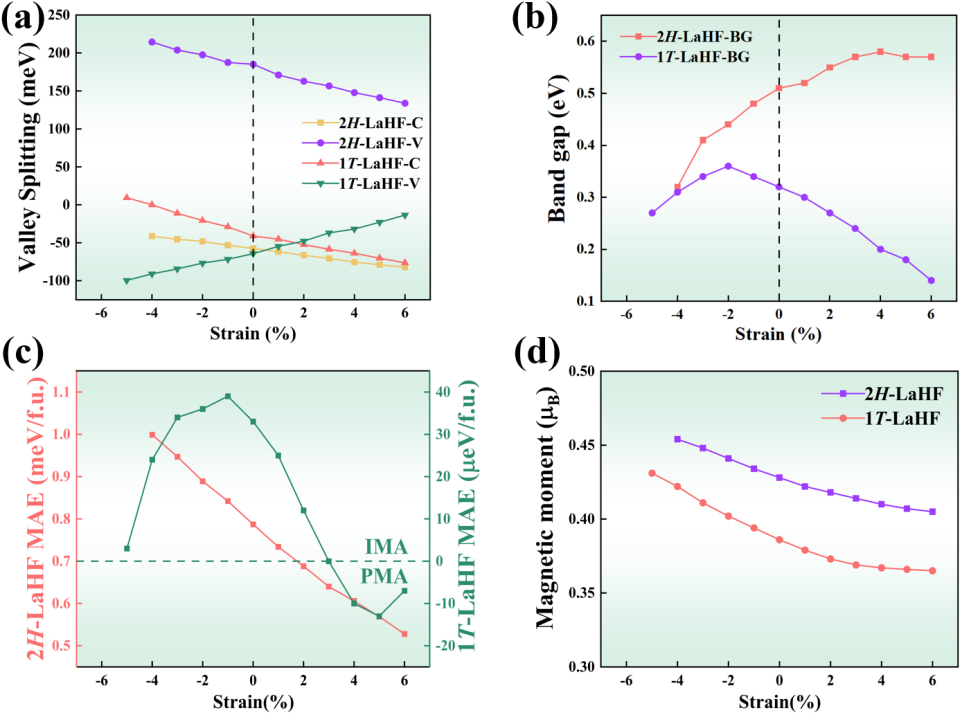


**Fig. S5.** (a) The valley splitting for both valence (V) and conduction (C) bands with different biaxial strains. (b) The band gap curves with different biaxial strains. (c) The MAE curves with different biaxial strain. (d) The local magnetic moments of La with different biaxial strains.


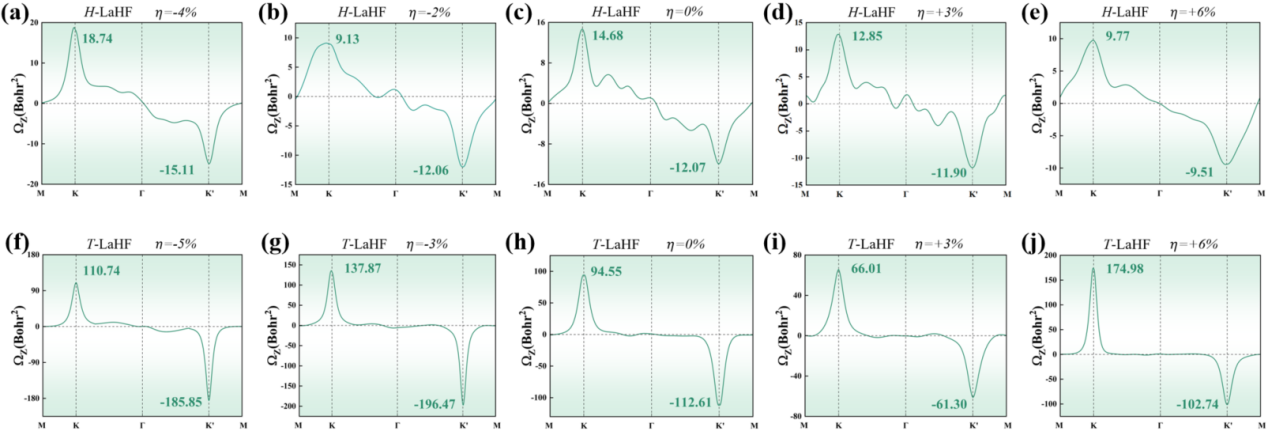


**Fig. S6.** The Berry Curvature of 2*H*-LaHF and 1*T*-LaHF under different biaxial strains.


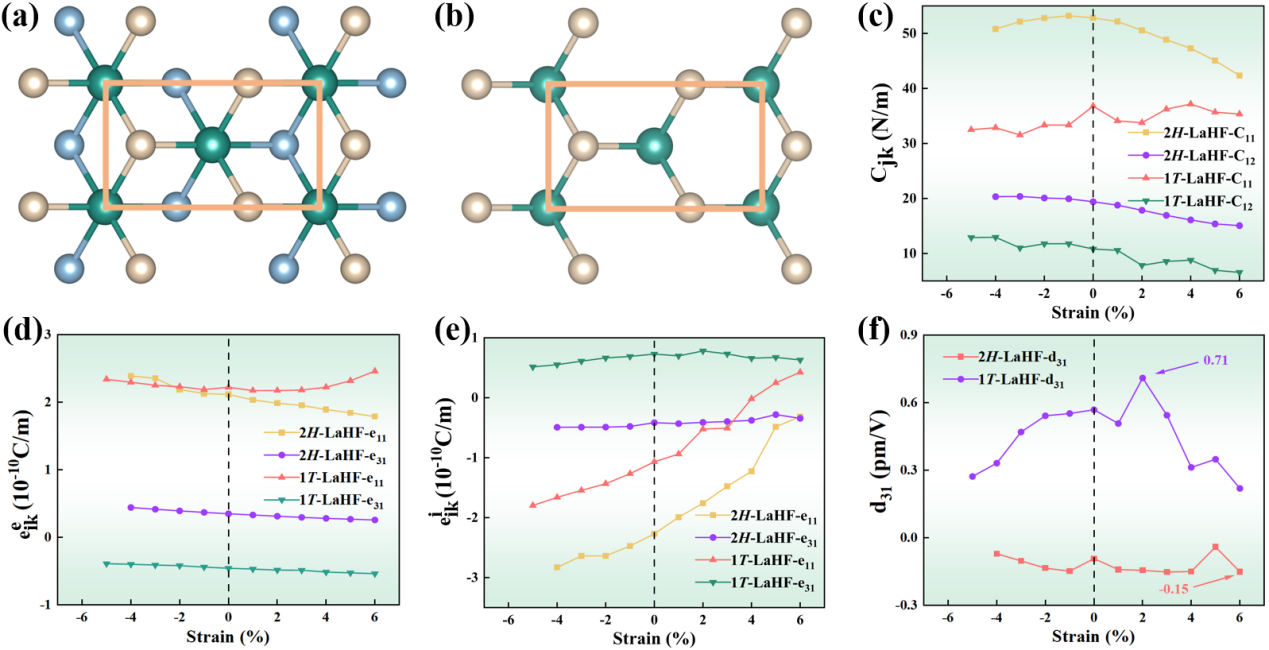


**Fig. S7.** The orthorhombic supercell of (a) 2*H*-LaHF and (b) 1*T*-LaHF for calculating piezoelectric coefficients. (c) The elastic constants as a function with biaxial strain. The contributions of (d) electrons and (e) ions for piezoelectric tensor . (f) The piezoelectric strain coefficient as a function of strain.

The piezoelectric coefficient reflects the relationship between stress and electronic output, and when is positive (negative), the intrinsic electric field generated by the piezoelectric effect is in the same (opposite) direction as the applied stress. Based on the large in-plane piezoelectric polarization, the large polarized electric fields can be induced by applying a small strain which is not sufficient to affect the electron band structure. Taking 1*T*-LaHF under -3% biaxial strain as an example (in Fig. S8(c)), K valley charge carriers can be selectively excited by charge doping. When the + (-) uniaxial strain is applied, the charge carriers are driven by the polarized electric field to produce , while (-) is obtained under the action of unequal Berry curvature. The induction of the in-plane polarized electric field enables the realization of PAVHE without dependence on any external field, which have great significance for the fundamental research of valley-related multiple Hall effect.


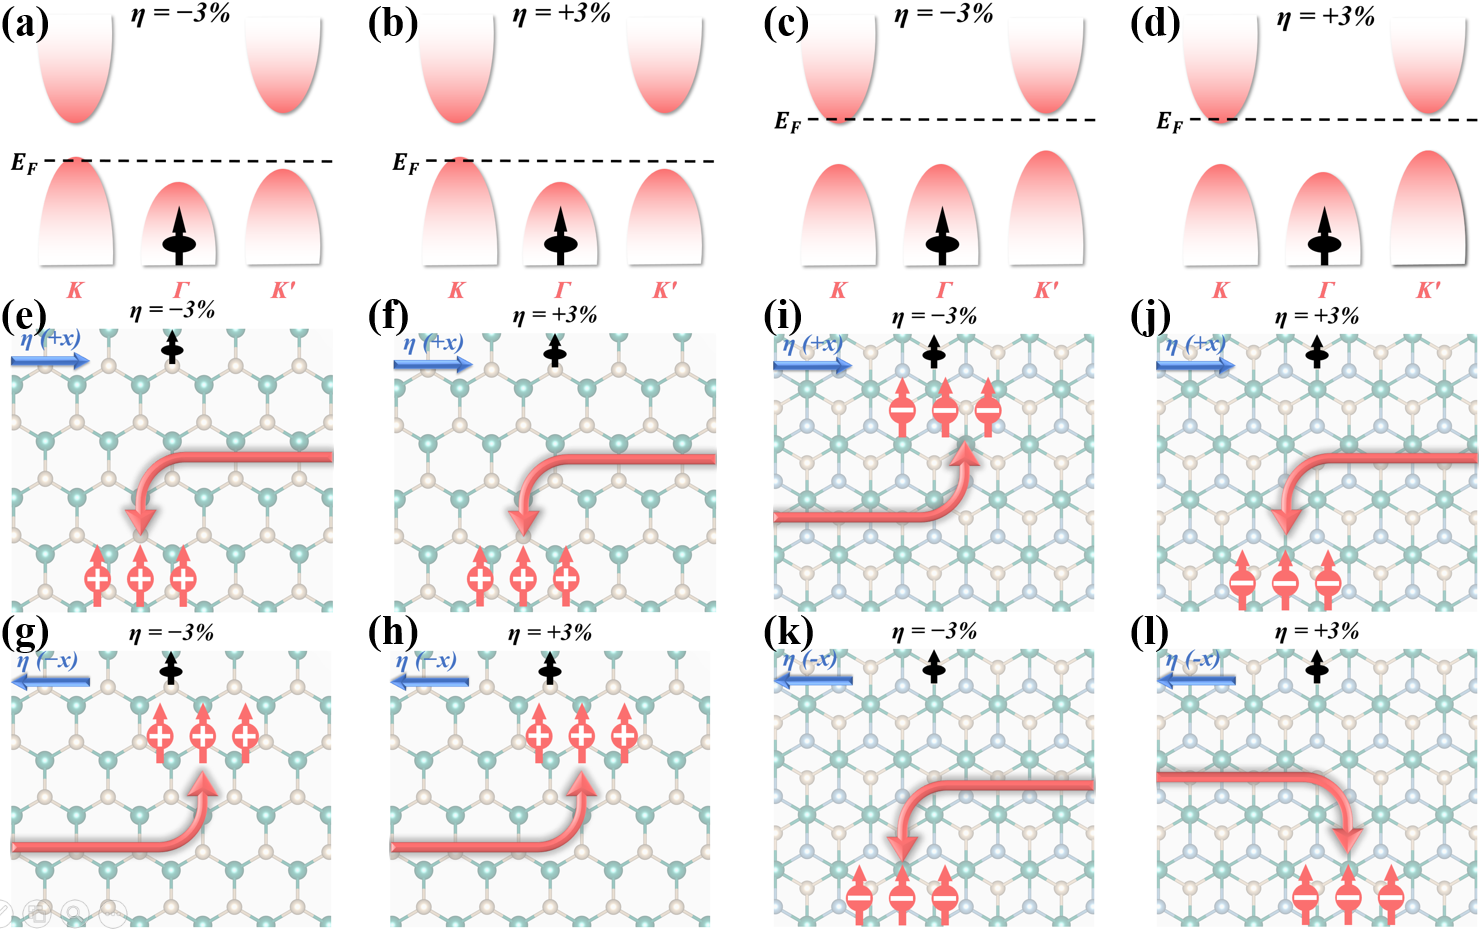


**Fig. S8.** The diagrams of regulating Fermi energy levels under hole-doping for 2*H*-LaHF at (a) -3% and (b) +3% biaxial strain. The diagrams of regulating Fermi energy levels under electron-doping for 1*T*-LaHF at (c) -3% and (d) +3% biaxial strain. Under different biaxial strain, the diagram of the PAVHE for (e)-(h) 2*H*-LaHF and (i)-(l) 1*T*-LaHF when different stress is applied.


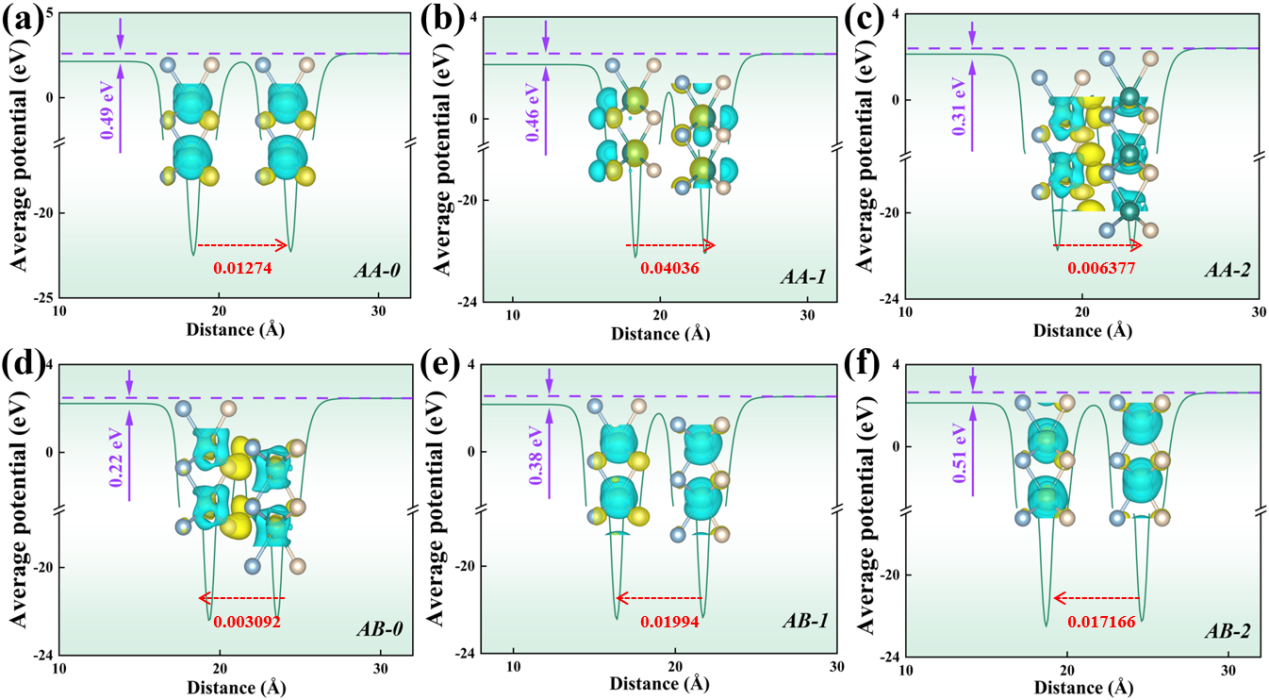


**Fig. S9.** Plane averaged electrostatic potential for (a) AA-0, (b) AA-1, (c) AA-2, (d) AB-0, (e) AB-1, (f) AB-1 stackings. Red arrows and numbers represent the charge transfer between layers.


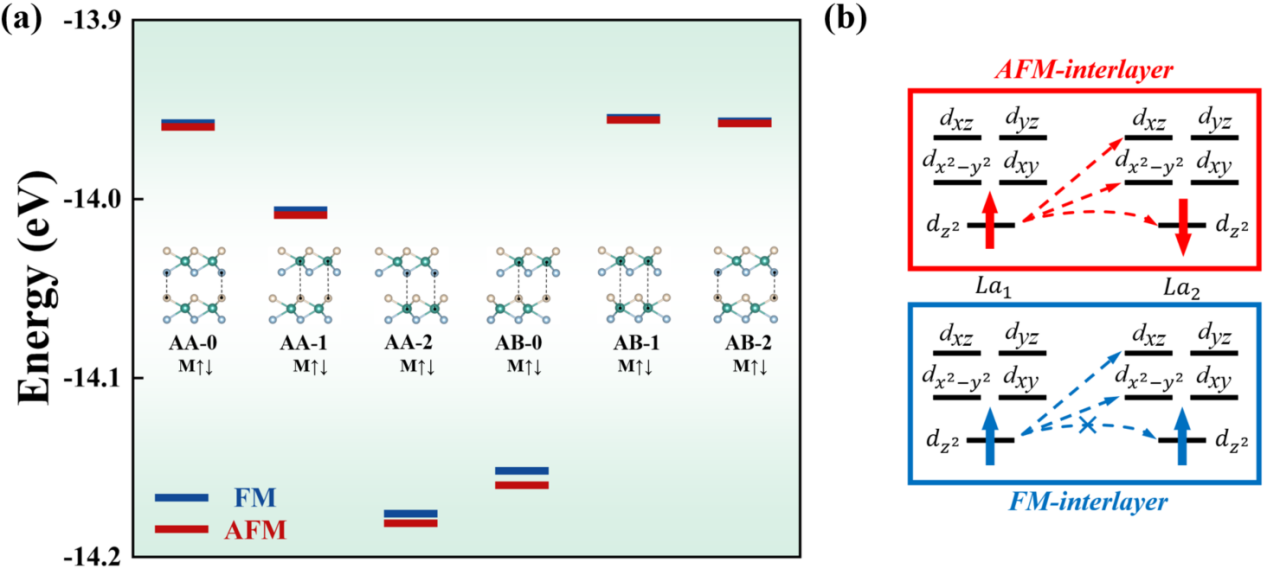


**Fig. S10.** (a) The energy of AA-0, AA-1, AA-2, AB-0, AB-1 and AB-2 stackings with FM and AFM states. (b) Schematic of the orbital dependent interlayer exchange interactions. The hopping from to is in AFM exchange, while it is prohibited in the FM exchange.


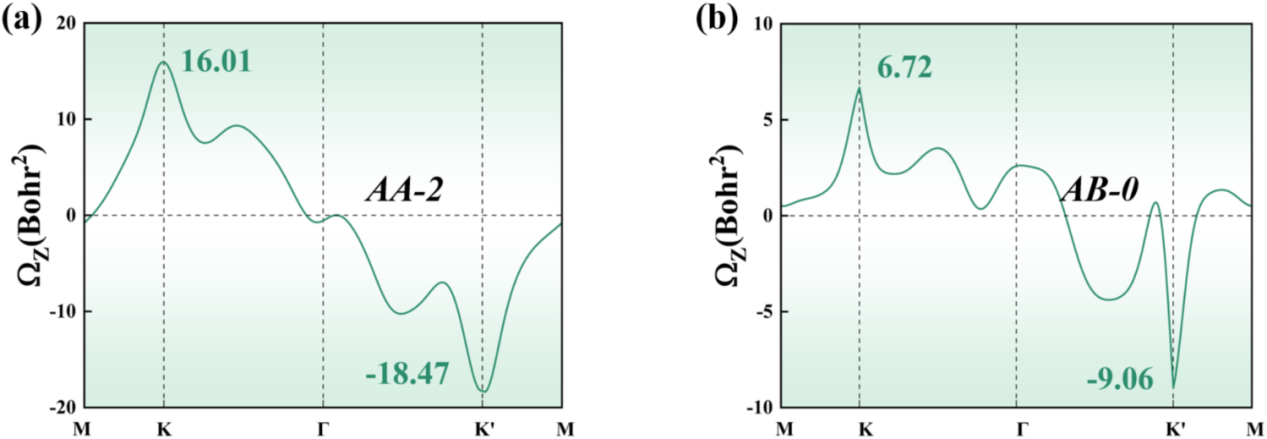


**Fig. S11.** The Berry curvature of AA-2 and AB-0 stacking.


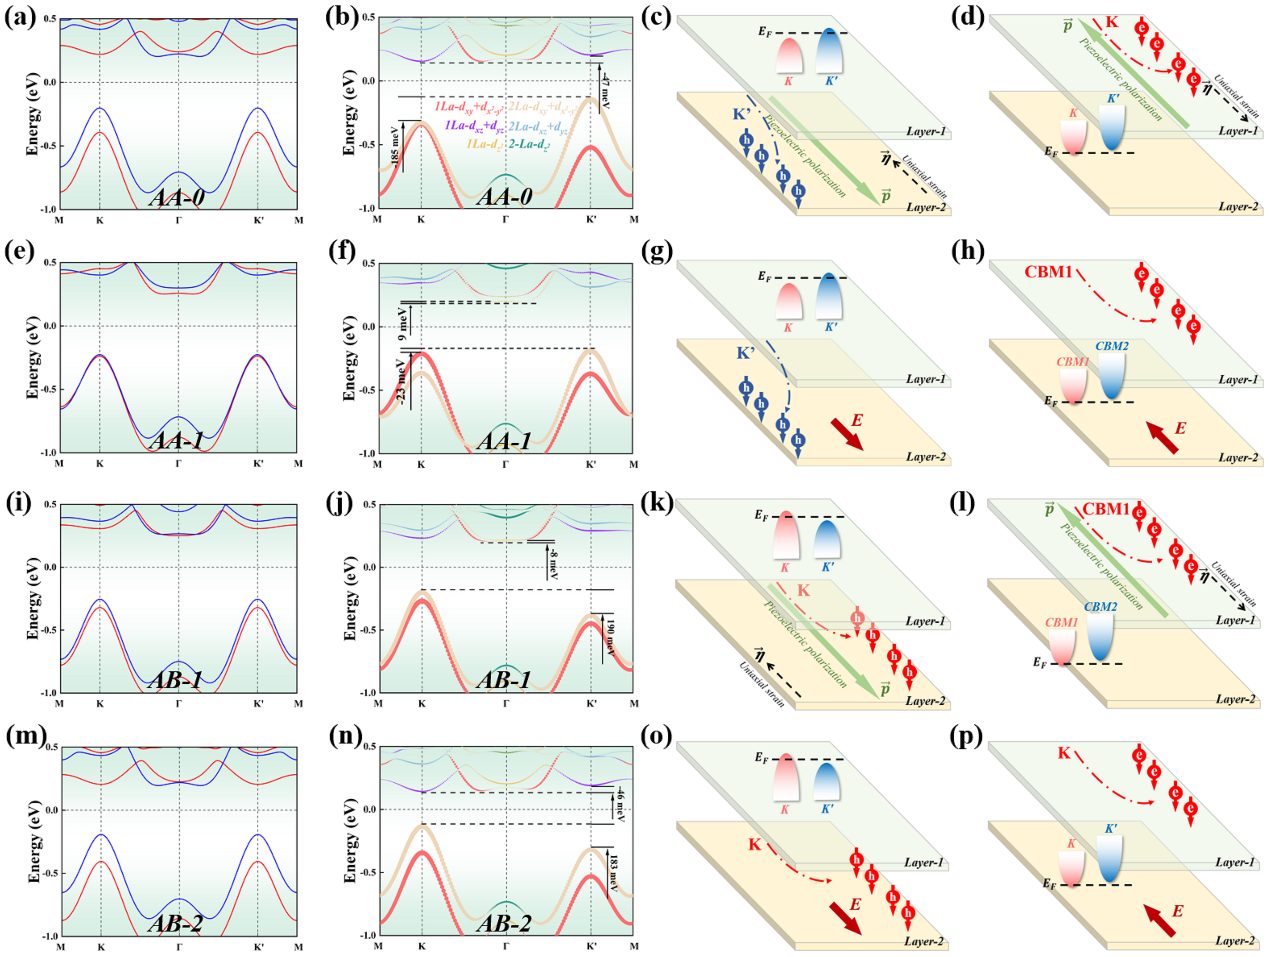


**Fig. S12.** The electric band structures without SOC, the projected band structures with SOC and the diagrams of transport phenomenon for (a-d) AA-0, (e-h) AA-1, (i-l) AB-1 and (m-p) AB-2 stackings. (c), (d), (k) and (l) shows the LHE induced by the piezoelectric response. The carriers from K and K' valleys of different layers are indicated using red and blue markers, respectively, with arrows marking the spin orientations.

1. 1College of Science, Civil Aviation University of China, Tianjin 300300, China. 2School of Physics, Beihang University, Beijing 100191, China. e-mail: lijia@cauc.edu.cn (Jia Li); liminliu@buaa.edu.cn (Limin Liu). [↑](#footnote-ref-0)
